# Supplementary material for: Sulfated Hyaluronan Derivatives Modulate TGF-β1:Receptor Complex Formation: Possible Consequences for TGF-β1 Signaling
Source: PubMed Central journal article supplement (PMC5430790; doi:10.1038/s41598-017-01264-8), 2017-04-26
Supplement: 41598_2017_1264_MOESM1_ESM.pdf [file 41598_2017_1264_MOESM1_ESM.pdf]

# Supplementary Information

For Sci Rep SREP-16-41359B

## Sulfated Hyaluronan Derivatives Modulate TGF- $\beta$ 1:Receptor Complex Formation: Possible Consequences for TGF- $\beta$ 1 Signaling

Linda Koehler, Sergey Samsonov, Sandra Rother, Sarah Vogel, Sebastian Köhling, Stephanie Moeller, Matthias Schnabelrauch, Jörg Rademann, Ute Hempel, M. Teresa Pisabarro, Dieter Scharnweber, Vera Hintze\*

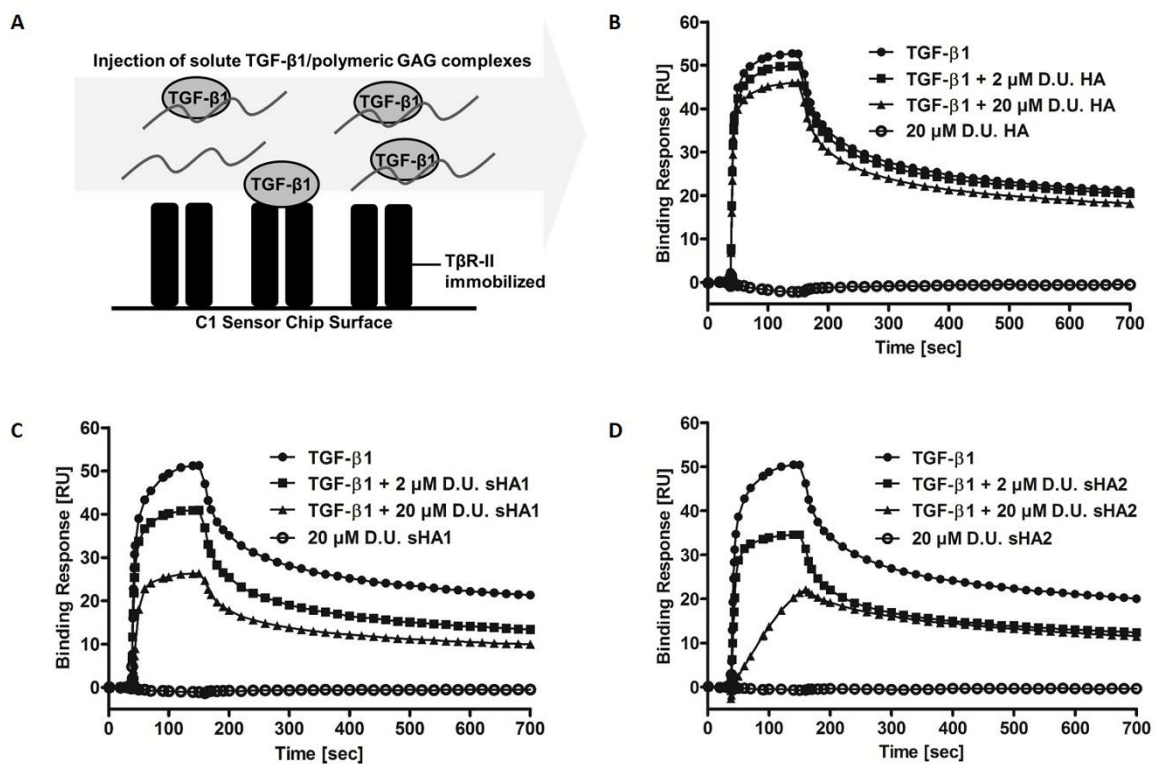

**Supplementary Figure S1.** Binding of TGF- $\beta$ 1 to immobilized T $\beta$ R-II after pre-incubation with different GAG derivatives. (A) Schematic drawings of the experimental set-up. (B) Relative binding of 40 nM TGF- $\beta$ 1 to T $\beta$ R-II alone and after pre-incubation with 2 and 20  $\mu$ M D.U. of (B) HA, (C) sHA1 and (D) sHA2. One representative sensorgram out of three measurements is shown for each GAG derivative.

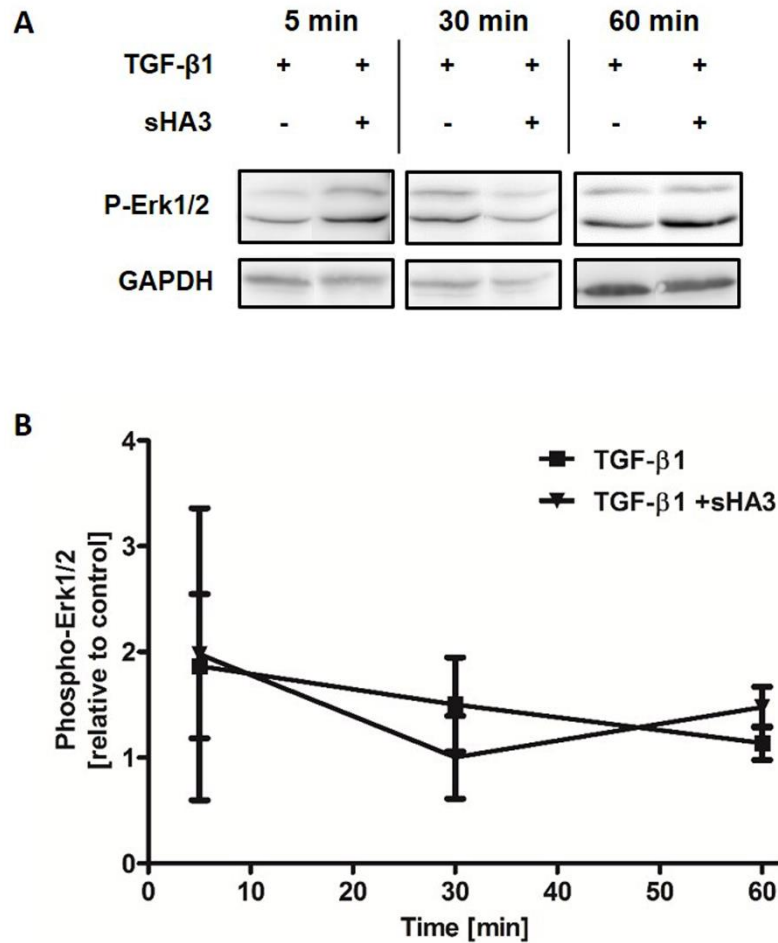

**Supplementary Figure S2.** Influence of sHA3 on the TGF- $\beta$ 1-mediated Erk1/2 phosphorylation. Hs27 fibroblast cells were stimulated with 10 ng/ml TGF- $\beta$ 1 (0.4 nM) alone or pre-formed complexes of TGF- $\beta$ 1 and 100  $\mu$ g/ml sHA3 (130  $\mu$ M D.U.) for the indicated time points. Cells were lysed and applied to Western Blot analyses using specific anti-phospho-Erk1/2 and GAPDH antibodies. (A) For every time point a representative blot is shown. The time course of TGF- $\beta$ 1-mediated phosphorylation in the presence and absence of sHA3 is plotted for (B) Erk1/2 phosphorylation relative to unstimulated cells.
